# Supplementary material for: Innervation modulates the functional connectivity between pancreatic endocrine cells
Source: eLife. 2022 Apr 4;11:e64526. doi: 10.7554/eLife.64526 (PMC9007585; doi:10.7554/eLife.64526)
Supplement: Figure 1—source data 1. — Mean distance of pancreatic islet cells to islet core reveals a beta cell core and alpha cell mantle. [file elife-64526-fig1-data1.xlsx]

## Sheet: Sheet1
Figure 1 - source data 1
Figure 1C. Mean distance of pancreatic islet cells to islet core reveals a beta cell core and alpha cell mantle
	Mean distance to islet core (µm)
Embryo no.	β	δ	α
1	12.95	16.73	19.02
2	13.99	17.93	15.3
3	12.75	15.05	22.27
4	13.16	17.74	18.74
5	13.13	17.29	17.65
6	13.89	16.43	18.35
7	13.49	17.84	19.07
8	14.46	19.98	21.01
9	14.08	19.7	21.49
10	13.83	16.86	21.03
11	12.04	16.87	17.79
