# Supplementary material for: Innervation modulates the functional connectivity between pancreatic endocrine cells
Source: eLife. 2022 Apr 4;11:e64526. doi: 10.7554/eLife.64526 (PMC9007585; doi:10.7554/eLife.64526)
Supplement: Figure 2—source data 1. — Percentage of islet nerve density in contact with the specified pancreatic islet cell type. [file elife-64526-fig2-data1.xlsx]

## Sheet: Sheet1
Figure 2 - source data 1
Figure 2C. Percentage of islet nerve density in contact with the specified pancreatic islet cell type
% islet nerve density
β (n=18)	δ (n=14)	α (n=7)
47.0847	56.3183	31.6063
62.2429	55.8336	33.9092
62.0777	52.0849	31.6108
49.5937	61.01	31.851
61.9973	64.3574	19.3007
62.6406	67.3545	30.1236
60.6801	66.2331	34.9789
62.9572	78.1062
69.4475	69.8031
65.8366	65.7275
64.5767	74.1738
67.8517	74.6092
57.0582	60.414
59.9786	72.433
53.8198
64.3357
71.6114
64.0578
