# Supplementary material for: Innervation modulates the functional connectivity between pancreatic endocrine cells
Source: eLife. 2022 Apr 4;11:e64526. doi: 10.7554/eLife.64526 (PMC9007585; doi:10.7554/eLife.64526)
Supplement: Figure 2—source data 2. — The percentage of cells of a given type with neural activity connection. [file elife-64526-fig2-data2.xlsx]

## Sheet: Sheet1
Figure 2 - source data 2
Figure 2D. The percentage of cells of a given type with neural activity connection
	% cells with neural activity connection
Embryo no.	β	δ	α
1	55.5556	29.4118	16.6667
2	25.7143	22.2222	18.1818
3	11.1111	31.25	33.3333
4	52.3809	50	20
5	44.4444	21.0526	15.3846
6	58.3333	25	44.4444
