# Supplementary material for: Innervation modulates the functional connectivity between pancreatic endocrine cells
Source: eLife. 2022 Apr 4;11:e64526. doi: 10.7554/eLife.64526 (PMC9007585; doi:10.7554/eLife.64526)
Supplement: Figure 3—source data 1. — Whole larva-free glucose-level measurements at 100 hpf. [file elife-64526-fig3-data1.xlsx]

## Sheet: Sheet1
Figure 3 - source data 1
Figure 3B. Whole larva free glucose level measurements at 100 hpf
	Glucose level (pmol/larva)
	control (n=32)	BoTx (n=24)
	541.466	635.516
	535.712	583.771
	526.484	863.747
	512.035	831.091
	569.151	830.864
	553.902	715.209
	615.419	715.389
	582.301	701.433
	454.104	549.391
	457.265	615.755
	495.306	729.213
	502.999	391.738
	484.228	554.569
	481.433	505.212
	523.019	637.821
	515.54	869.399
	470.869	1006.78
	448.211	811.017
	597.304	699.142
	493.458	776.436
	493.119	731.268
	540.749	415.538
	498.971	927.116
	500.859	745.138
	559.532
	558.234
	492.006
	447.664
	539.735
	539.624
	480.541
	581.153
