# Supplementary material for: Innervation modulates the functional connectivity between pancreatic endocrine cells
Source: eLife. 2022 Apr 4;11:e64526. doi: 10.7554/eLife.64526 (PMC9007585; doi:10.7554/eLife.64526)
Supplement: Figure 3—source data 2. — Quantification of primary islet mass. [file elife-64526-fig3-data2.xlsx]

## Sheet: Sheet1
Figure 3 - source data 2
Figure 3C. Quantification of primary islet mass
	Primary islet mass (µm3)
	control (n=21)	BoTx (n=29)
	40335.9	43581.4
	34003.1	61300.7
	36044.6	72491.5
	46148	51334.4
	63617.2	52238.9
	35459.9	64421.2
	44561.7	53789
	43435.5	49006.9
	39415.1	53317.6
	42392.9	44434.3
	29316.6	52607.2
	53086.8	47687.2
	48449	51161
	35211.9	53617
	44068	41577.2
	39182.9	42914.9
	41202.9	43792.3
	42762.2	41157.9
	46355.6	54155.5
	37227.3	59761.1
	35415.3	51362.6
		48224.5
		57155.7
		54947.7
		52746.8
		35904
		32537.3
		47479.8
		41608.2
