# Supplementary material for: Innervation modulates the functional connectivity between pancreatic endocrine cells
Source: eLife. 2022 Apr 4;11:e64526. doi: 10.7554/eLife.64526 (PMC9007585; doi:10.7554/eLife.64526)
Supplement: Figure 3—source data 3. — Mean distance of pancreatic islet cells to islet core. [file elife-64526-fig3-data3.xlsx]

## Sheet: Sheet1
Figure 3 - source data 3
Figure 3D. Mean distance of pancreatic islet cells to islet core
	Mean distance to islet core (µm)
	β (n=21)	δ (n=21)	β (n=29)	δ (n=29)
	13.6	16.94	15.51	17.7
	13.76	16.69	15.83	19.71
	13.36	17.56	17.79	22.01
	15.87	19.09	16.51	17.97
	16.12	18.5	16.09	18.55
	13.05	17.28	16.77	20.24
	16.71	19.82	16.33	19.27
	18.04	20.11	16.15	19.75
	16.17	18.14	16.29	19.14
	16.48	19.81	16.08	19.18
	13.52	16.93	17.31	19.19
	17.19	20.39	15.52	18.51
	16.51	18.59	16.51	20.31
	14.44	17.83	16.76	20.95
	16.7	18.98	17.16	19.49
	14.83	17.84	15.13	19.04
	14.79	19.55	16.91	19.41
	14.95	19	16	18.75
	16.3	19.22	17.11	19.29
	15.78	17.63	16.75	20.5
	14.83	18.51	16.73	19.4
			16.35	19.31
			17.88	19.9
			15.98	19.72
			15.58	19.74
			14.8	17.53
			15.1	17.54
			16.39	19.26
			15.27	18.34
