# Supplementary material for: Innervation modulates the functional connectivity between pancreatic endocrine cells
Source: eLife. 2022 Apr 4;11:e64526. doi: 10.7554/eLife.64526 (PMC9007585; doi:10.7554/eLife.64526)
Supplement: Figure 5—source data 1. — Whole larva-free glucose-level measurements of Tg(elavl3:sypb-miniSOG2-P2A-mScarlet) zebrafish. [file elife-64526-fig5-data1.xlsx]

## Sheet: Sheet1
Figure 5 - source data 1
Figure 5A. Whole larva free glucose level measurements of Tg(elavl3:sypb-miniSOG2-P2A-mScarlet) zebrafish
	Glucose level (pmol/larva)
	Neg (n=22)	Neg+Light (n=31)	miniSOG2 (n=24)	miniSOG2+Light (n=28)
	349.211	427.06	391.954	441.642
	387.002	325.05	243.224	418.583
	387.252	467.209	278.425	296.414
	367.737	446.853	227.971	417.464
	391.576	410.891	368.748	451.97
	347.914	488.025	476.314	479.312
	318.694	471.169	467.584	491.247
	432.398	437.818	484.011	421.406
	292.958	574.206	504.154	374.168
	531.355	417.464	355.21	409.723
	526.057	515.262	519.364	276.553
	411.562	463.151	395.236	268.85
	300.791	437.482	348.548	418.55
	313.802	492.53	328.131	351.785
	362.2	381.96	217.289	296.158
	522.184	389.29	383.086	482.238
	497.376	495.212	416.641	343.611
	312.994	500.058	337.045	327.333
	474.409	480.341	246.983	378.043
	230.407	373.197	353.661	207.602
	256.904	496.83	390.926	439.406
	300.208	339.38	247.528	361.466
		457.178	309.884	344.033
		468.825	266.016	341.632
		464.697		516.468
		521.018		376.663
		460.131		407.652
		346.102		364.122
		428.036
		409.818
		313.392
