# Supplementary figures and images for: Innervation modulates the functional connectivity between pancreatic endocrine cells
Source: eLife journal article supplement (doi:10.7554/elife.64526), 2022-04-04

Figure 3 - Figure Supplement 1

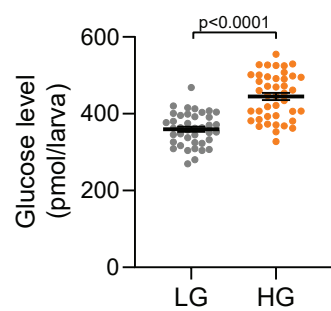

Supplement: supp [file elife_poa_e64526_Figure_3_figure_supplement_1.pdf › elife_poa_e64526_Figure_3_figure_supplement_1.pdf]

Figure 3 - Figure Supplement 2

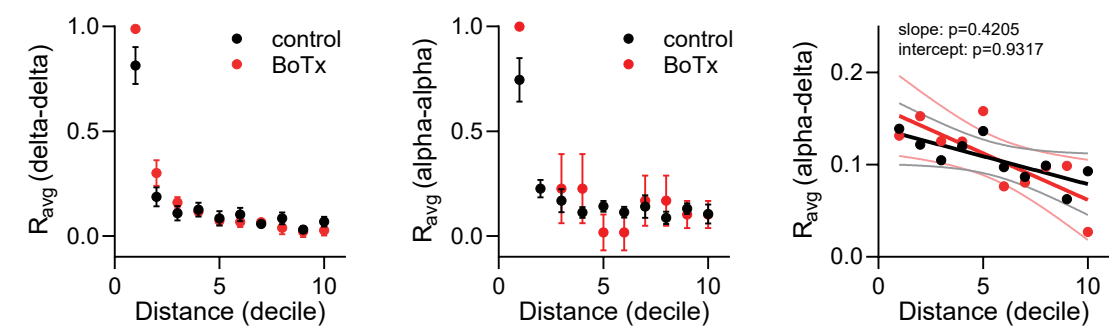

Supplement: supp [file elife_poa_e64526_Figure_3_figure_supplement_2.pdf › elife_poa_e64526_Figure_3_figure_supplement_2.pdf]

Figure 3 - Figure Supplement 3

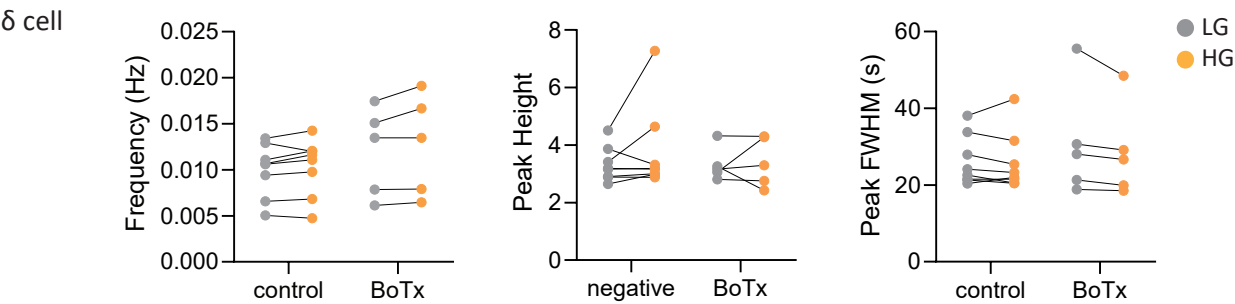

Supplement: supp [file elife_poa_e64526_Figure_3_figure_supplement_3.pdf › elife_poa_e64526_Figure_3_figure_supplement_3.pdf]

Figure 4 - Figure Supplement 1

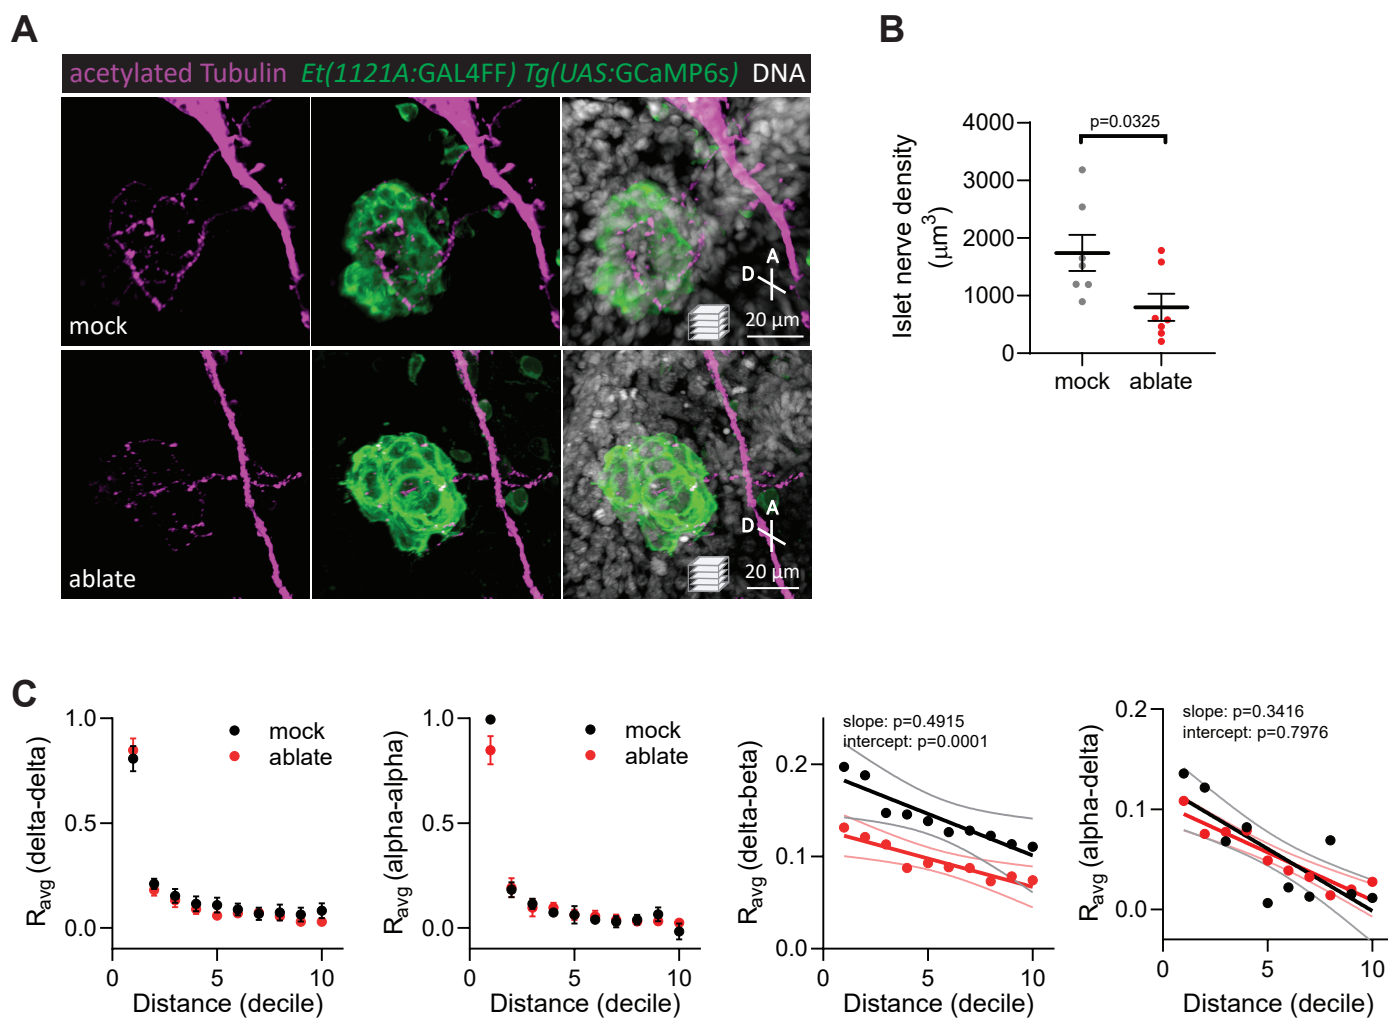

Supplement: supp [file elife_poa_e64526_Figure_4_figure_supplement_1.pdf › elife_poa_e64526_Figure_4_figure_supplement_1.pdf]

Figure 4 - Figure Supplement 2

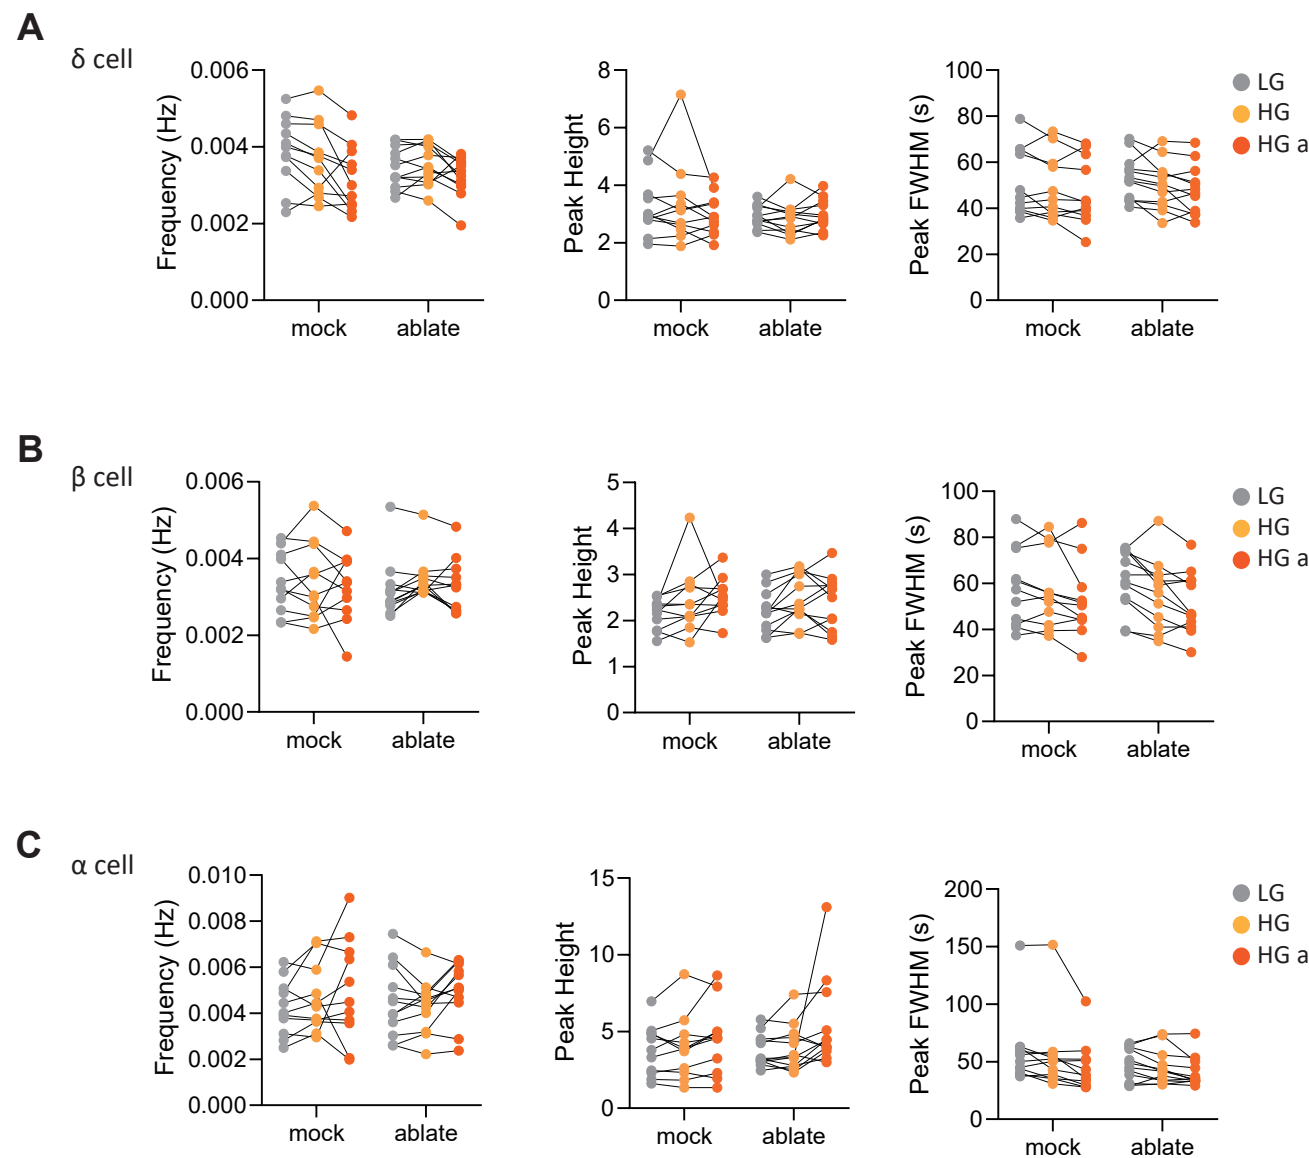

Supplement: supp [file elife_poa_e64526_Figure_4_figure_supplement_2.pdf › elife_poa_e64526_Figure_4_figure_supplement_2.pdf]

Figure 5 - Figure Supplement 1

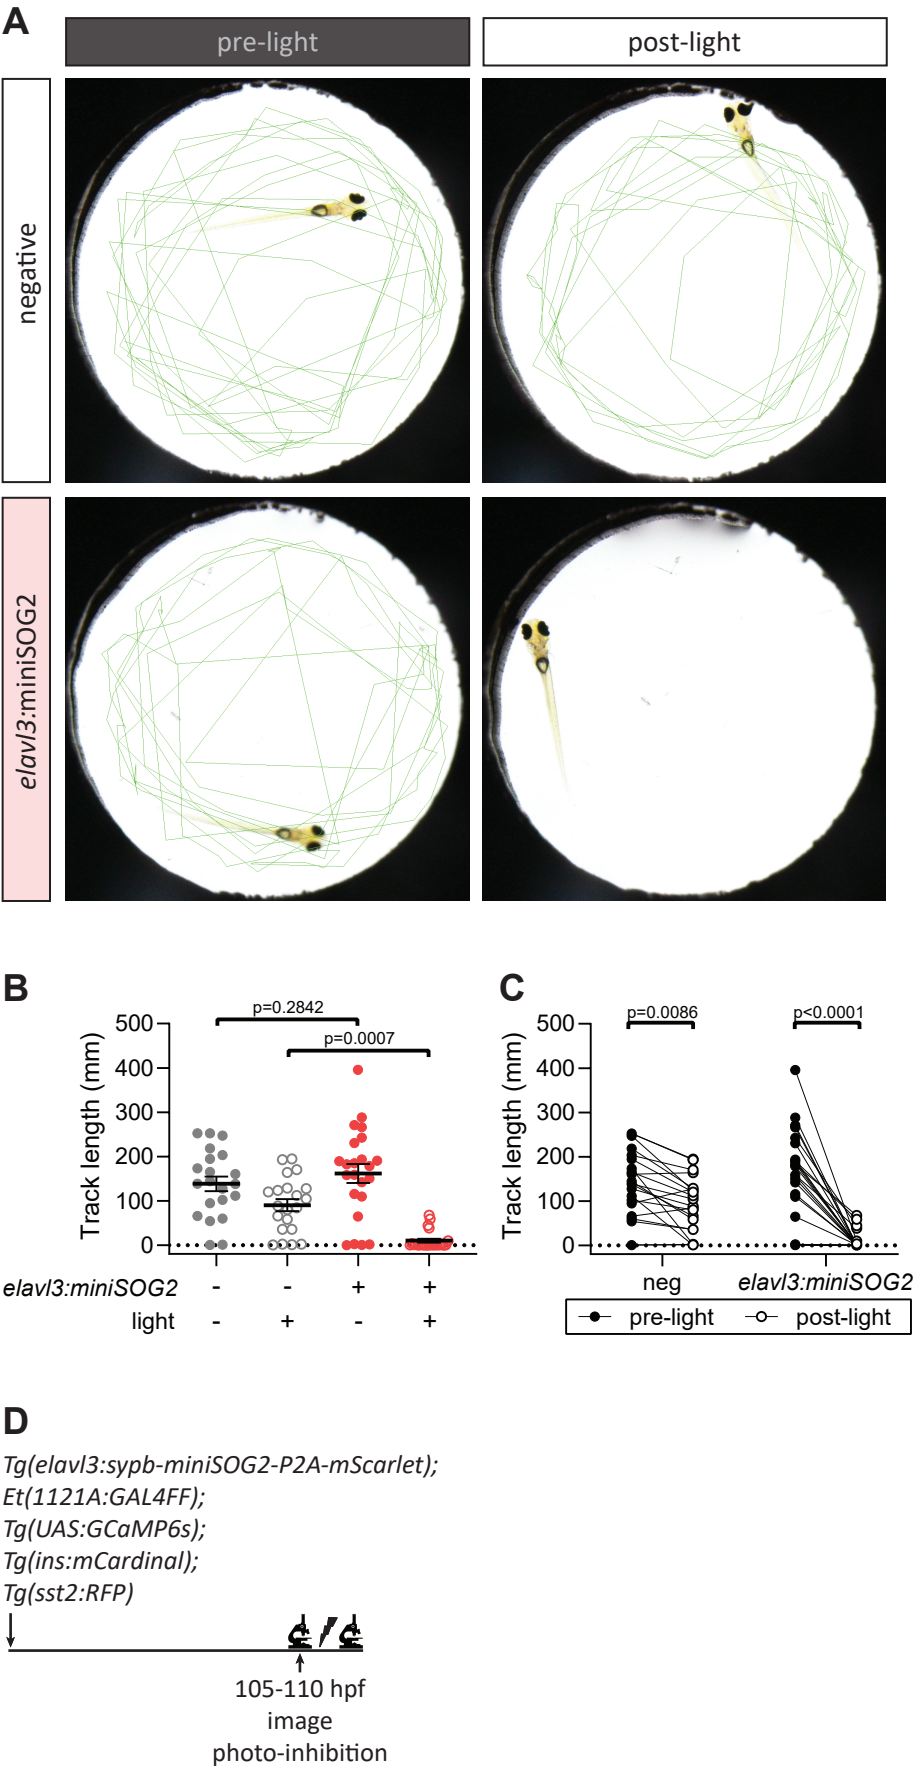

Supplement: supp [file elife_poa_e64526_Figure_5_figure_supplement_1.pdf › elife_poa_e64526_Figure_5_figure_supplement_1.pdf]

Figure 5 - Figure Supplement 2

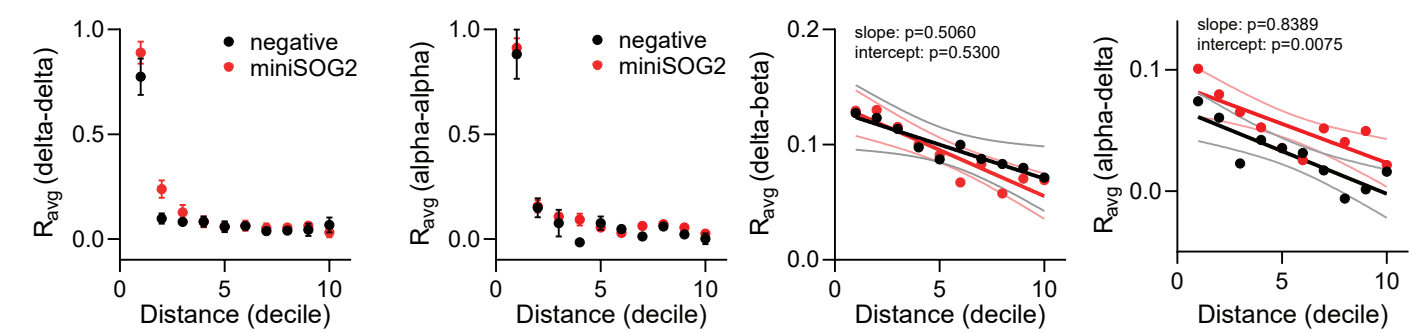

Supplement: supp [file elife_poa_e64526_Figure_5_figure_supplement_2.pdf › elife_poa_e64526_Figure_5_figure_supplement_2.pdf]
